# Supplementary material
Source: PubMed Central journal article supplement (PMC6641611)
Supplement: ao7b00714_si_001.pdf [file ao7b00714_si_001.pdf]

**Supporting Information for**

“Nickel Complexes of *C*-Substituted Cyclams and Their Activity for CO<sub>2</sub> and H<sup>+</sup> Reduction”

Timothy D. Cook, Sarah F. Tyler, Caitlyn M. McGuire, Matthias Zeller, Phillip E. Fanwick, Dennis H.

Evans, Dennis G. Peters and Tong Ren\*

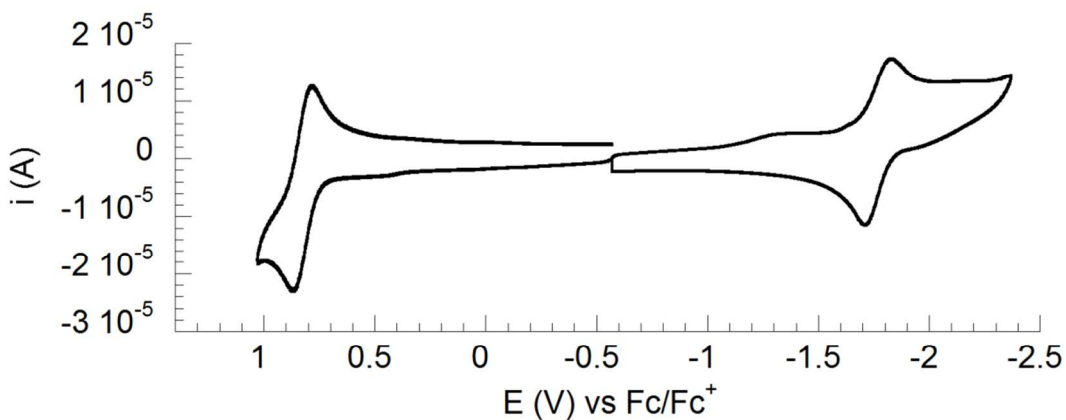

Figure S1: Cyclic voltammogram of **1** in neat MeCN solution of 0.1 M Bu<sub>4</sub>NPF<sub>6</sub>.

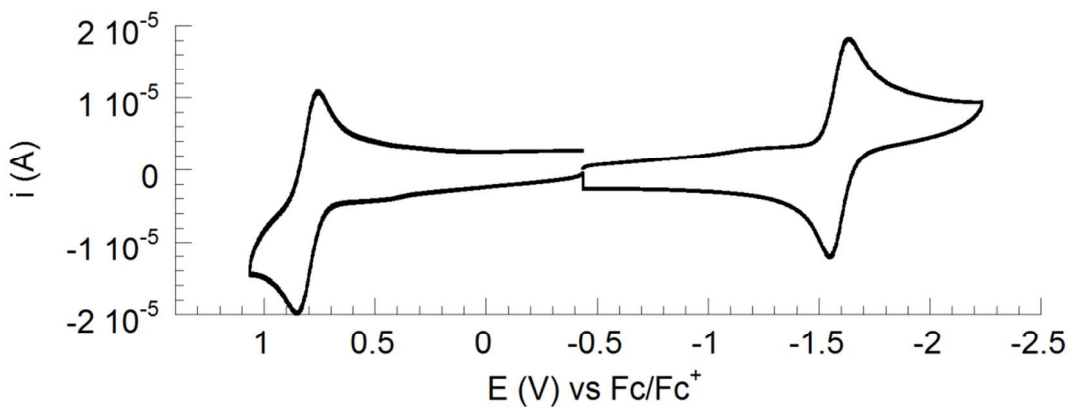

Figure S2: Cyclic voltammogram of **2** in neat MeCN solution of 0.1 M Bu<sub>4</sub>NPF<sub>6</sub>.

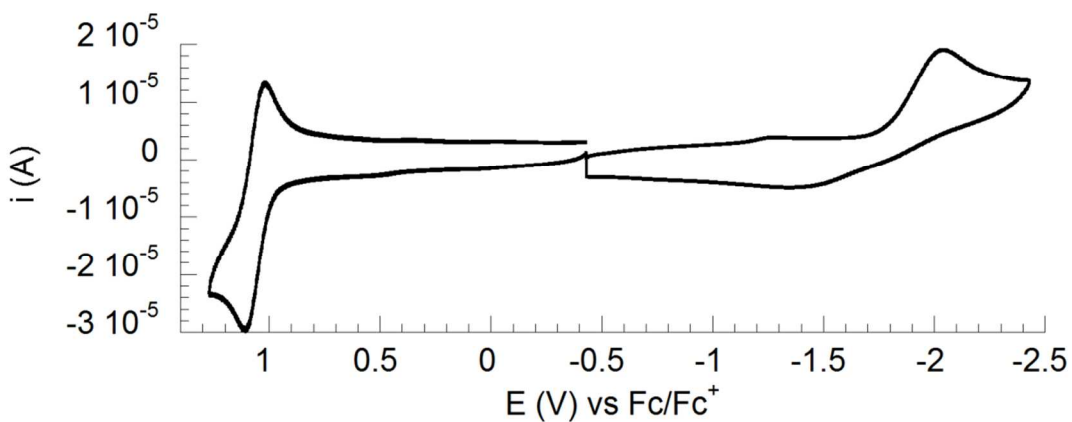

Figure S3: Cyclic voltammogram of **3** in neat MeCN solution of 0.1 M Bu<sub>4</sub>NPF<sub>6</sub>.

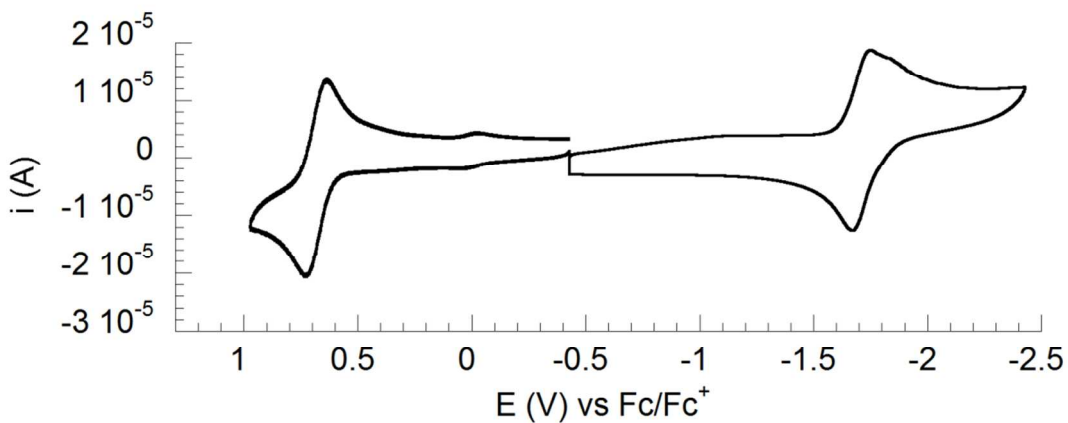

Figure S4: Cyclic voltammogram of **4** in neat MeCN solution of 0.1 M Bu<sub>4</sub>NPF<sub>6</sub>.

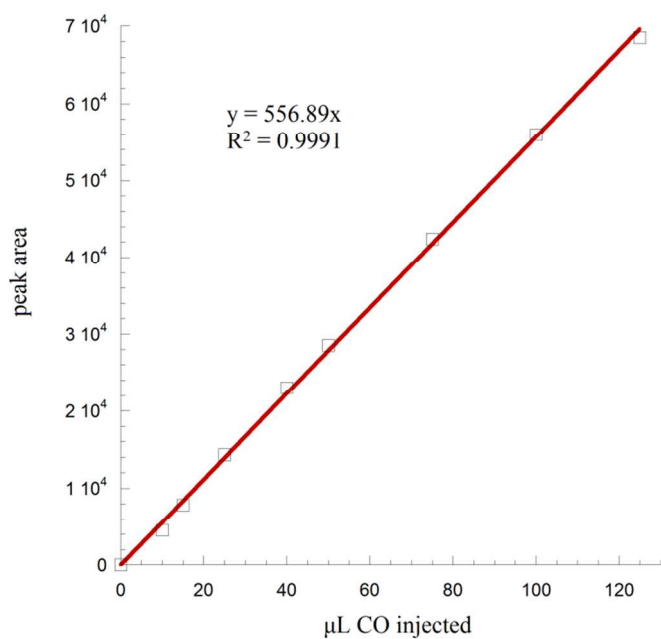

Figure S5: Calibration plot for CO detection using a gas chromatograph with a thermal conductivity detector. Neat samples were injected directly into the chromatograph.

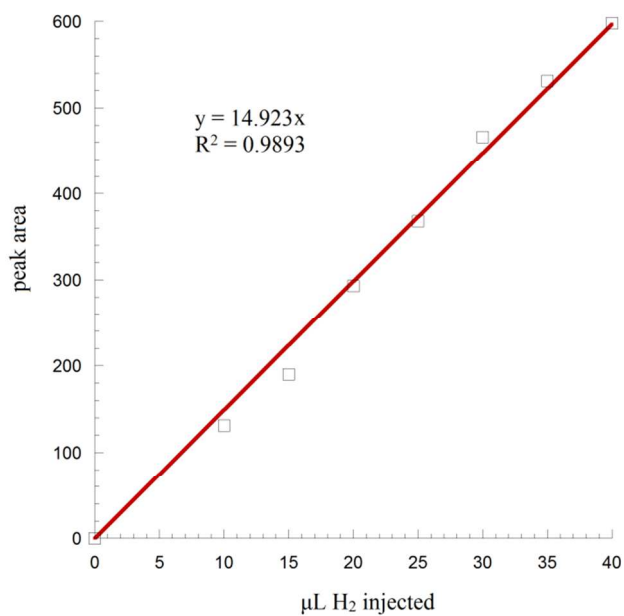

Figure S6: Calibration plot for H<sub>2</sub> detection using a gas chromatograph with a thermal conductivity detector. Neat samples were injected directly into the chromatograph.

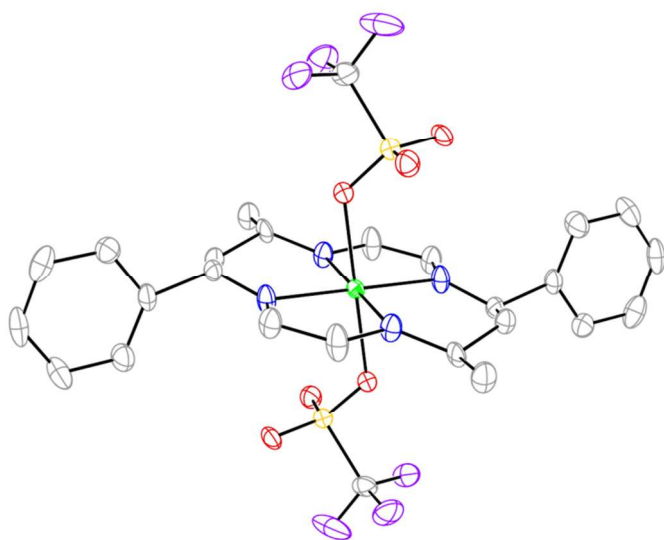

Figure S7: Crystal structure of **1'** at 15% probability level. H atoms have been omitted for clarity. The crystal was grown via slow diffusion of hexanes into a concentrated solution in EtOH.

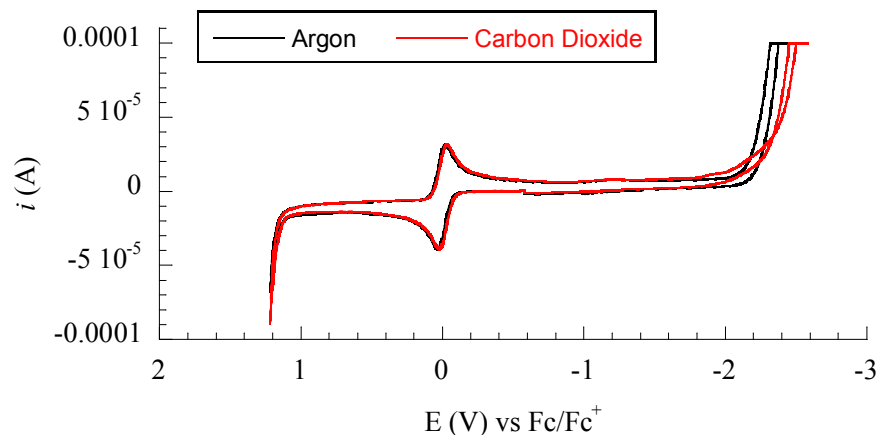

Figure S8: Background scans under both Ar and CO<sub>2</sub> in a 20% aqueous MeCN solution of 0.08 M Bu<sub>4</sub>NPF<sub>6</sub>. The only peak observed is the added ferrocene as the external reference.

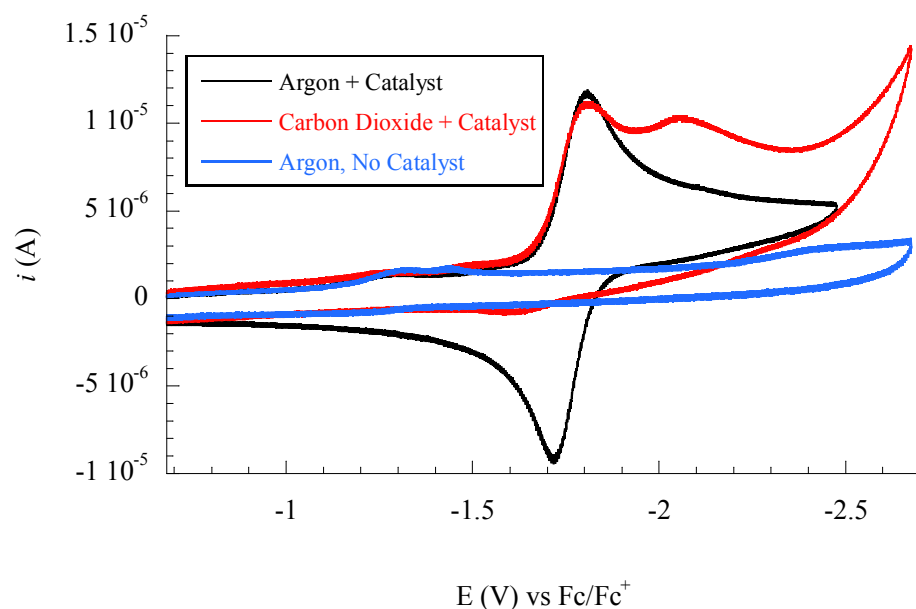

Figure S9: Cyclic voltammograms of **1** (1.0 mM) under Ar and CO<sub>2</sub> in a neat MeCN solution of 0.08 M Bu<sub>4</sub>NPF<sub>6</sub>.

Table S1: CPE data for **1** compared to the CPE data of Ni(cyclam)Cl<sub>2</sub> using the same set-up.<sup>a</sup>

| Complex              | Q (C)      | FE, CO (%) | FE, H <sub>2</sub> (%) | TON, CO   | TON, H <sub>2</sub> |
|----------------------|------------|------------|------------------------|-----------|---------------------|
| <b>1<sup>b</sup></b> | 21.2 ± 0.7 | 80.0 ± 3.5 | 7.3 ± 0.5              | 4.5 ± 0.3 | 0.4 ± 0.0           |

|                                             |           |           |            |           |           |
|---------------------------------------------|-----------|-----------|------------|-----------|-----------|
| <b>Ni(cyclam)Cl<sub>2</sub><sup>c</sup></b> | 6.7 ± 1.4 | 35.3 ± 13 | 65.7 ± 2.9 | 0.5 ± 0.1 | 1.1 ± 0.2 |
| blank                                       | 2.9       | 1         | 77         | -         | -         |

<sup>a</sup> Performed in CO<sub>2</sub>-saturated solutions of 20% aqueous MeCN with 0.08 M NBu<sub>4</sub>PF<sub>6</sub>; Solutions were electrolyzed for 30 min and headspace gases were analyzed via GC–TCD. <sup>b</sup>Data reported as the averages of 2 trials. <sup>c</sup>Data reported as the averages of 3 trials. Q = total charge passed, faradaic efficiency (FE) =  $\frac{\text{charge to form product}}{\text{total charge passed}}$ , turnover number (TON) =  $\frac{\text{mol product}}{\text{mol catalyst}}$

Table S2: Crystal data for **1** (grown via slow diffusion of Et<sub>2</sub>O into a concentrated solution in MeCN), **2**, and **3**.

|                                                         | <b>1</b>                                                                                      | <b>2</b>                                                                                      | <b>3</b>                                                                                       |
|---------------------------------------------------------|-----------------------------------------------------------------------------------------------|-----------------------------------------------------------------------------------------------|------------------------------------------------------------------------------------------------|
| molecular formula                                       | C <sub>30</sub> H <sub>42</sub> F <sub>6</sub> N <sub>6</sub> NiO <sub>6</sub> S <sub>2</sub> | C <sub>28</sub> H <sub>42</sub> F <sub>6</sub> N <sub>4</sub> NiO <sub>7</sub> S <sub>2</sub> | C <sub>30</sub> H <sub>39</sub> F <sub>12</sub> N <sub>5</sub> NiO <sub>7</sub> S <sub>2</sub> |
| fw, g mol <sup>-1</sup>                                 | 819.52                                                                                        | 783.48                                                                                        | 932.49                                                                                         |
| space group                                             | <i>R</i> $\bar{3}$                                                                            | <i>P</i> 2 <sub>1</sub> / <i>c</i>                                                            | <i>P</i> $\bar{1}$                                                                             |
| <i>a</i> , Å                                            | 32.431                                                                                        | 14.792                                                                                        | 8.9397                                                                                         |
| <i>b</i> , Å                                            | 32.431                                                                                        | 9.055                                                                                         | 11.189                                                                                         |
| <i>c</i> , Å                                            | 9.769                                                                                         | 26.136                                                                                        | 19.998                                                                                         |
| <i>α</i> , °                                            | 90.00                                                                                         | 90.00                                                                                         | 89.46                                                                                          |
| <i>β</i> , °                                            | 90.00                                                                                         | 99.81                                                                                         | 78.41                                                                                          |
| <i>γ</i> , °                                            | 120.00                                                                                        | 90.00                                                                                         | 89.82                                                                                          |
| <i>V</i> , Å <sup>3</sup>                               | 8898.7                                                                                        | 3449.9                                                                                        | 1959.5                                                                                         |
| <i>Z</i>                                                | 9                                                                                             | 4                                                                                             | 2                                                                                              |
| $\rho_{\text{calcd}}$ , g cm <sup>-3</sup>              | 1.376                                                                                         | 1.508                                                                                         | 1.580                                                                                          |
| <i>T</i> , K                                            | 200                                                                                           | 150                                                                                           | 200                                                                                            |
| final <i>R</i> indicies<br>( <i>I</i> > 2σ( <i>I</i> )) | <i>RI</i> = 0.0585<br><i>wRI</i> = 0.1343                                                     | <i>RI</i> = 0.0426<br><i>wRI</i> = 0.1000                                                     | <i>RI</i> = 0.0476<br><i>wRI</i> = 0.1202                                                      |
| GOF on <i>F</i> <sup>2</sup>                            | 1.061                                                                                         | 1.022                                                                                         | 1.131                                                                                          |
